# Supplementary material for: Intensive professional vehicle-based shooting provides local control of invasive rusa deer in a peri-urban landscape
Source: Springer Nature journal article supplement (doi:10.1007/s10530-024-03345-y), 2024-06-03
Supplement: MOESM1 [file 10530_2024_3345_MOESM1_ESM.docx]

*Supplementary material for the publication:*

**Intensive professional vehicle-based shooting provides local control of invasive rusa deer in a peri-urban landscape.**

RH: Peri-urban rusa deer management

Sebastien ComteABH, Andrew J. BengsenC, Calum X. CunninghamD, Michelle DawsonEF, Anthony PopleG, David M. ForsythAB

ANSW Department of Primary Industries, Orange, NSW, Australia

BThe University of New South Wales, Sydney, NSW, Australia

CNSW Department of Primary Industries, Calala, NSW, Australia

DUniversity of Tasmania, School of Natural Sciences, Hobart, Tas, Australia

ESouth-East Local Land Services, Wollongong East, NSW, Australia

FNSW Department of Climate Change, Energy, Environment and Water, Parramatta, NSW, Australia

GQueensland Department of Agriculture and Fisheries, Dutton Park, Qld, Australia.

HCorresponding author. Email: [sebastien.comte@dpi.nsw.gov.au](mailto:sebastien.comte@dpi.nsw.gov.au)

**Appendix I: Cost-effectiveness of vehicle-based shooting**

**Table S1: Effectiveness of the six teams of professional vehicle-based shooters during the Illawarra Wild Deer Management Program in Wollongong LGA, eastern Australia, 2011–2021.**

| **Teams of shooters** | **Years** | **Number of nights** | **Deer killed per night  (95% confidence intervals)** |
| --- | --- | --- | --- |
| A | 2011–2016 | 228 | 5.6 (4.9–6.4) |
| B | 2012–2014 | 65 | 3.9 (3.2–4.6) |
| C | 2014–2015 | 24 | 5.9 (4.6–7.2) |
| D | 2016–2017 | 98 | 7.1 (6.3–7.9) |
| E | 2017–2022 | 249 | 5.3 (4.7–5.8) |
| F | 2018–2022 | 182 | 5.5 (4.8–6.1) |

**Figure S1: Modelled annual and monthly number of shooting sites visited per night of professional vehicle-based shooting of rusa deer during the Illawarra Wild Deer Management Program in Wollongong LGA, eastern Australia, 2011–2021. Model outputs are means (solid lines) and 95% confidence intervals (grey). Years start in May and end in April.**


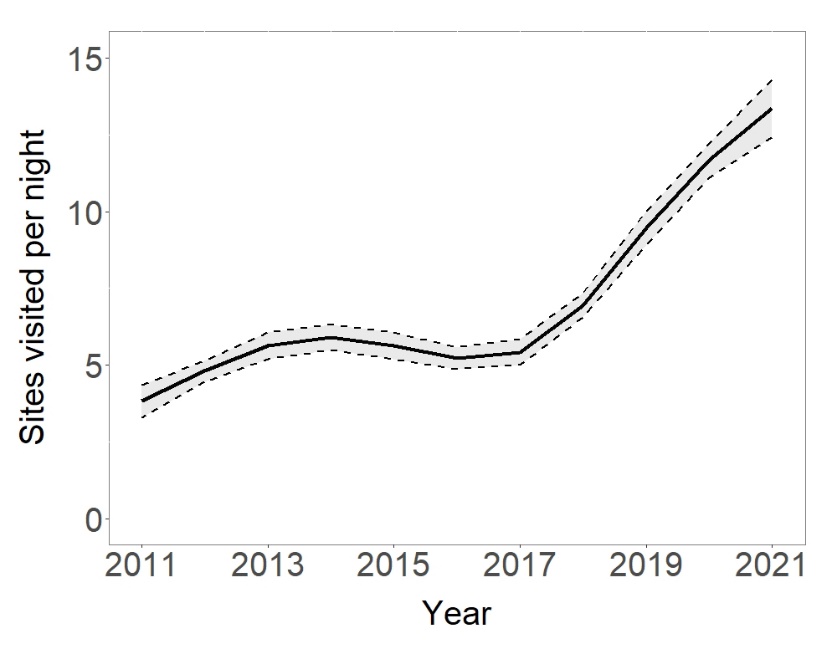


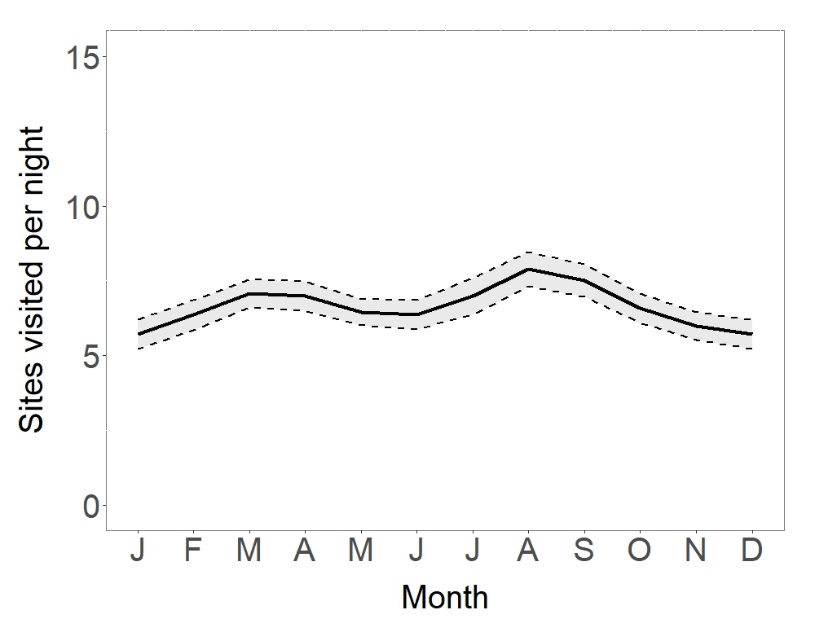


**Figure S2: Expected annual and monthly number of deer killed per site-visit by professional vehicle-based shooters of rusa deer during the Illawarra Wild Deer Management Program in Wollongong LGA, eastern Australia, 2011–2021. Model outputs are means (solid line) and 95% confidence intervals (grey). Years start in May and end in April.**


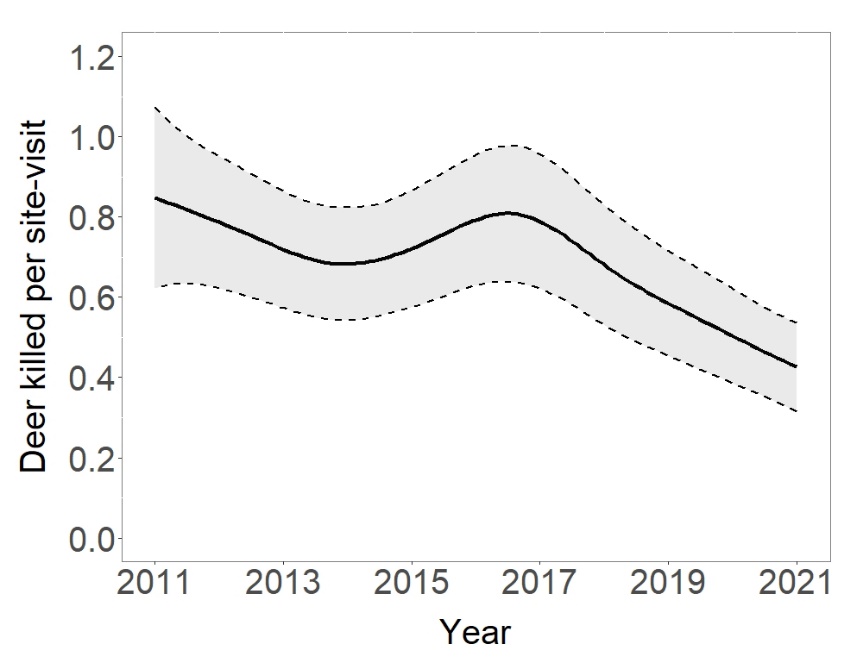


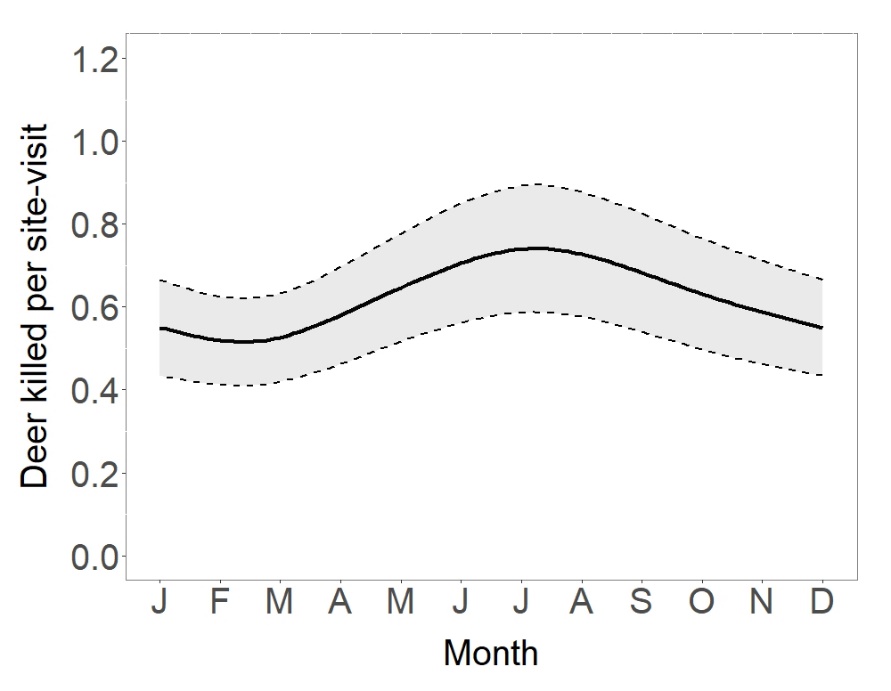


**Appendix II: Rusa deer relative abundance.**

**Figure S1. Expected faecal pellet count (April) during the Illawarra Wild Deer Management Program in Wollongong LGA, eastern Australia, 2011–2021. Years start in May and end in April.**

**
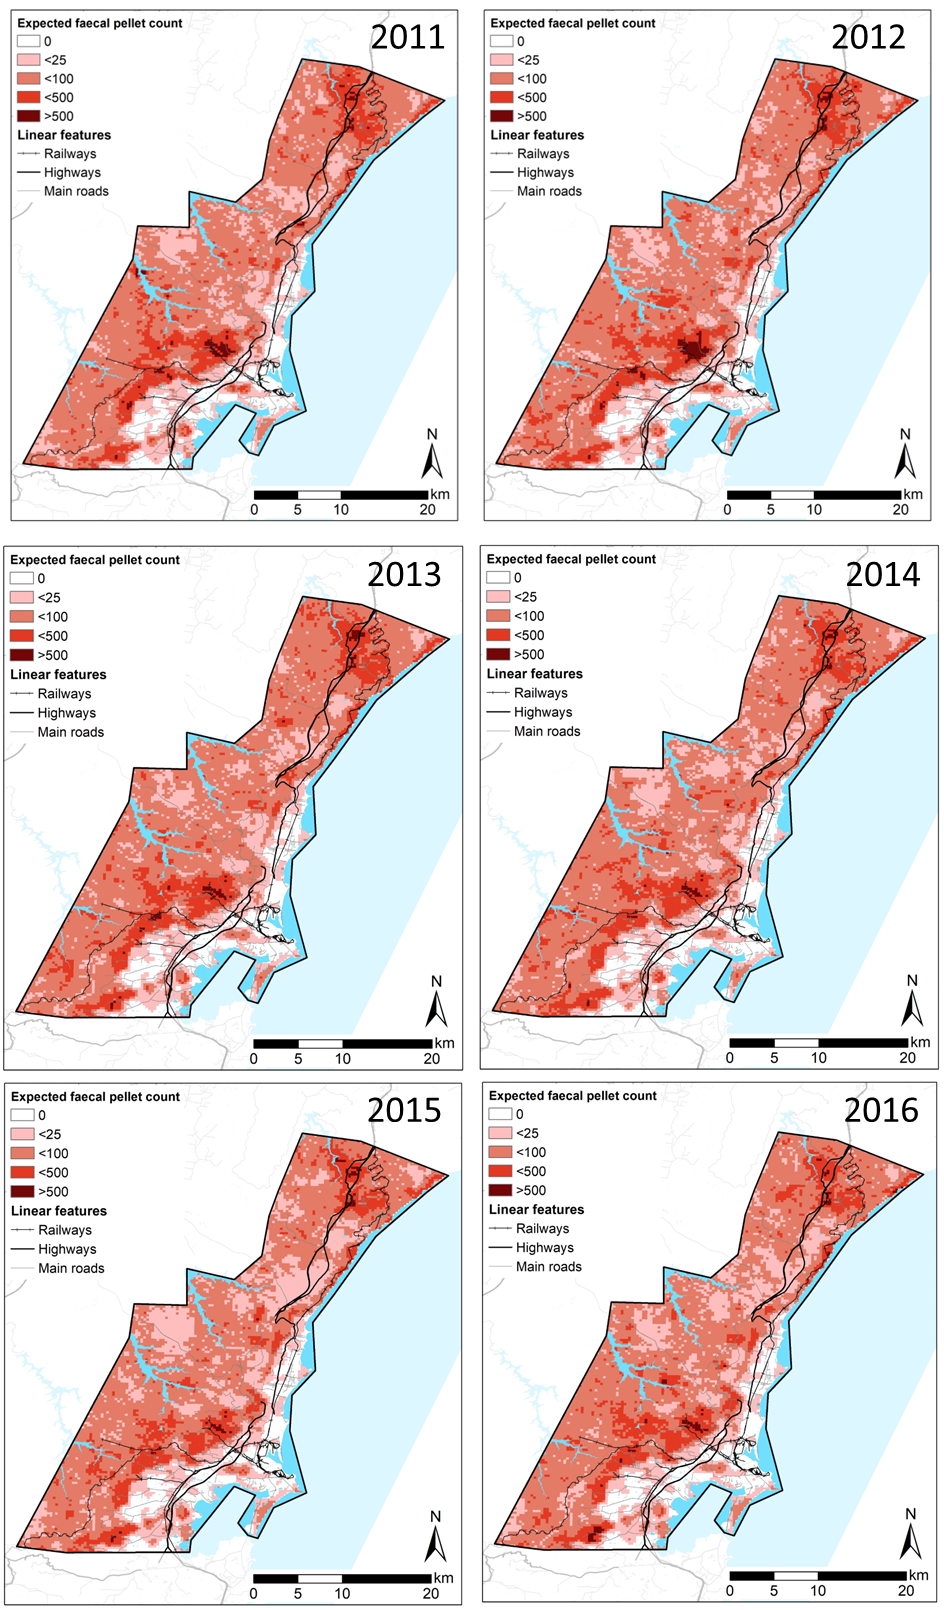
**

**
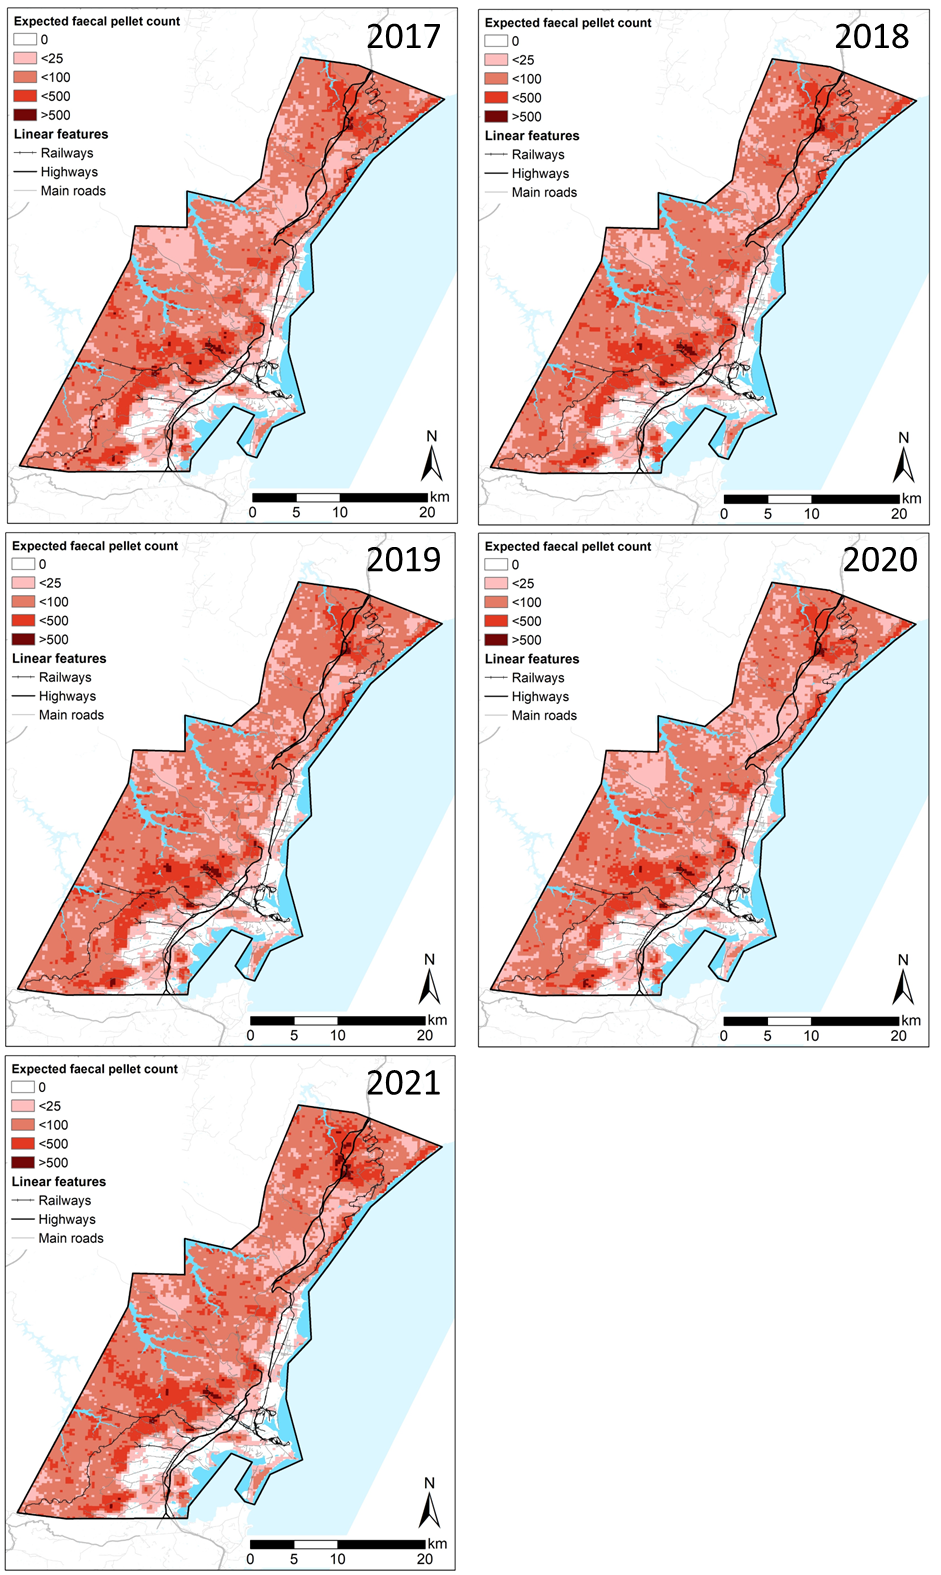
**

**Appendix III: Expected probabilities of resident complaints.**

**Figure S1. Expected annual probabilities of a resident complaint about rusa deer being lodged during the Illawarra Wild Deer Management Program in Wollongong LGA, eastern Australia, 2011–2018. Years start in May and end in April.**

**
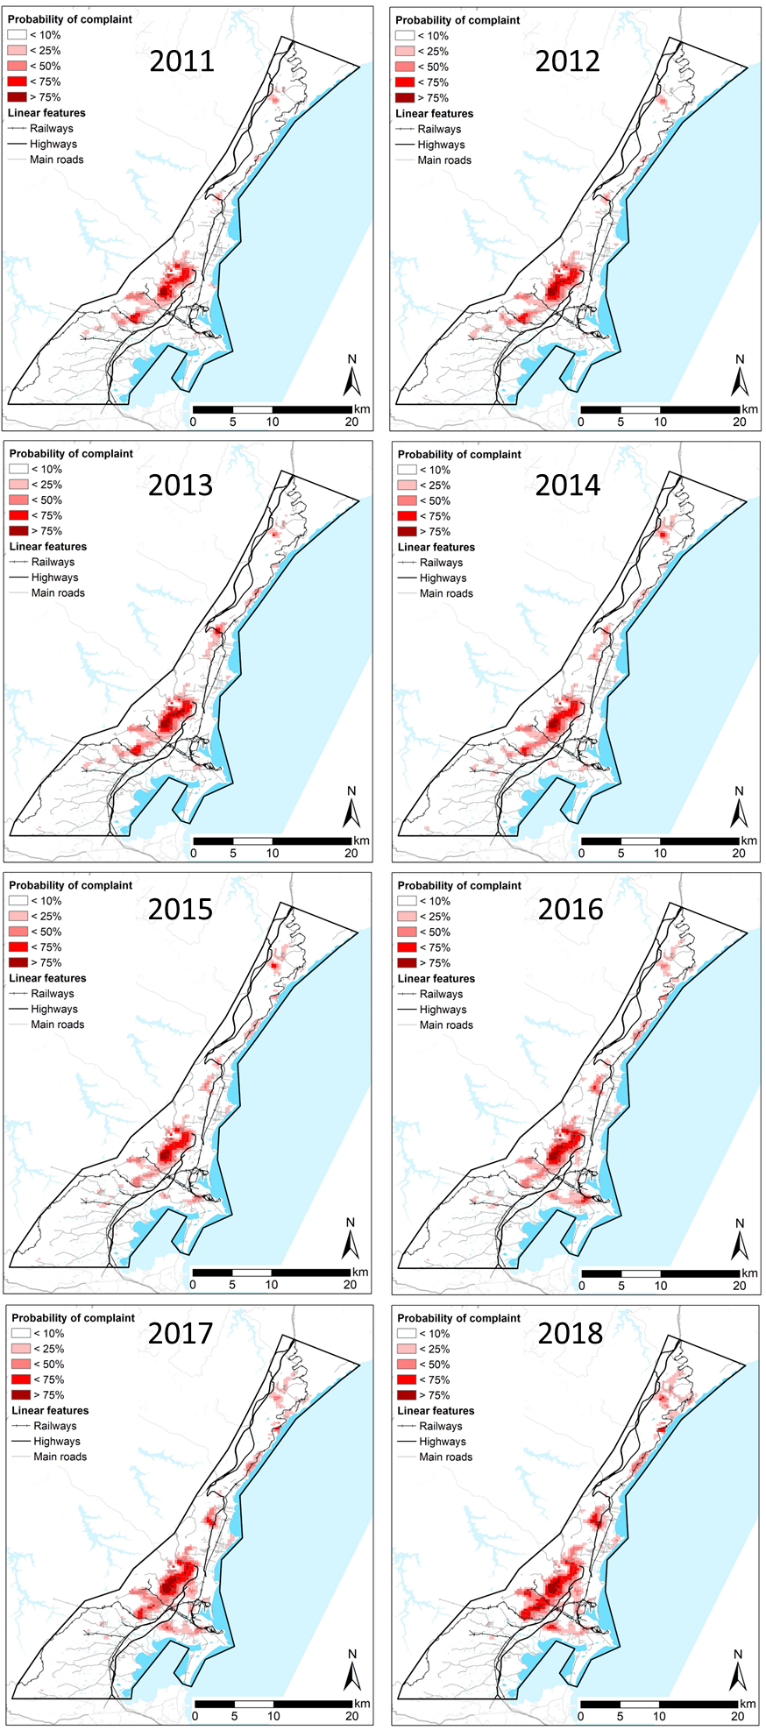
**
